# Supplementary material
Source: HighWire-hosted journal article supplement (http://erj.ersjournals.com/highwire/filestream/113939/field_highwire_adjunct_files/0/FAK_paper_ERJ_Supp_Figures_R1.pdf)

# Supplemental Figure 1

**A**

*FAK is hyperphosphorylated in PAH-PASMCs*

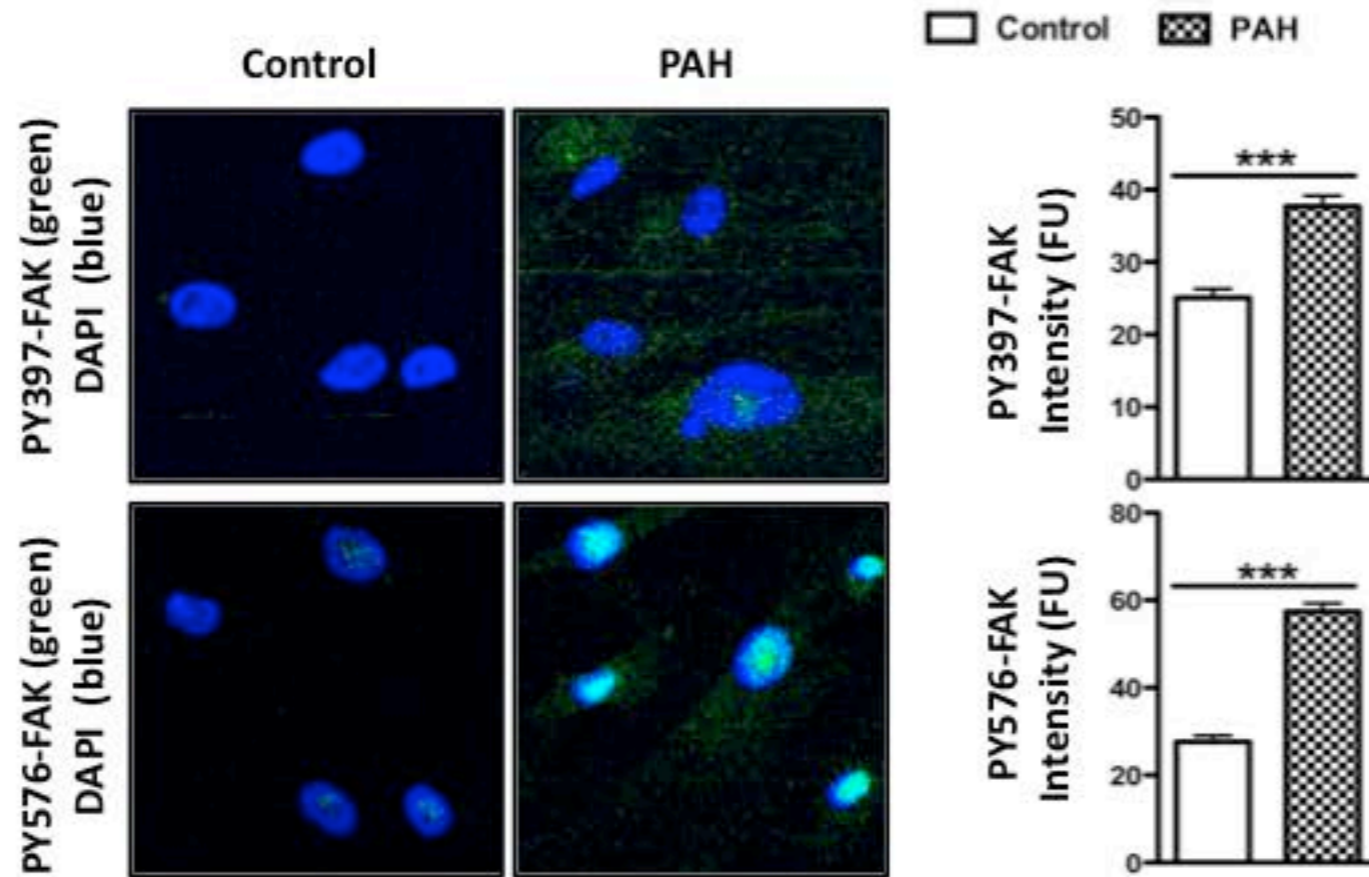

**B**

*Transfection efficiencies*

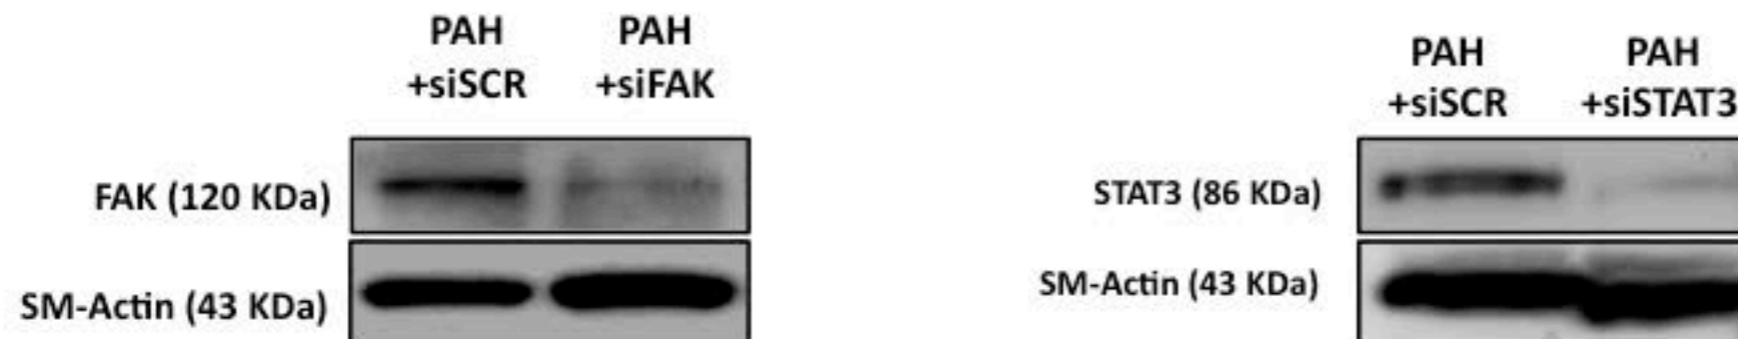

## Supplemental Figure 2

*PY576-FAK is increased in distal arteries of human PAH*

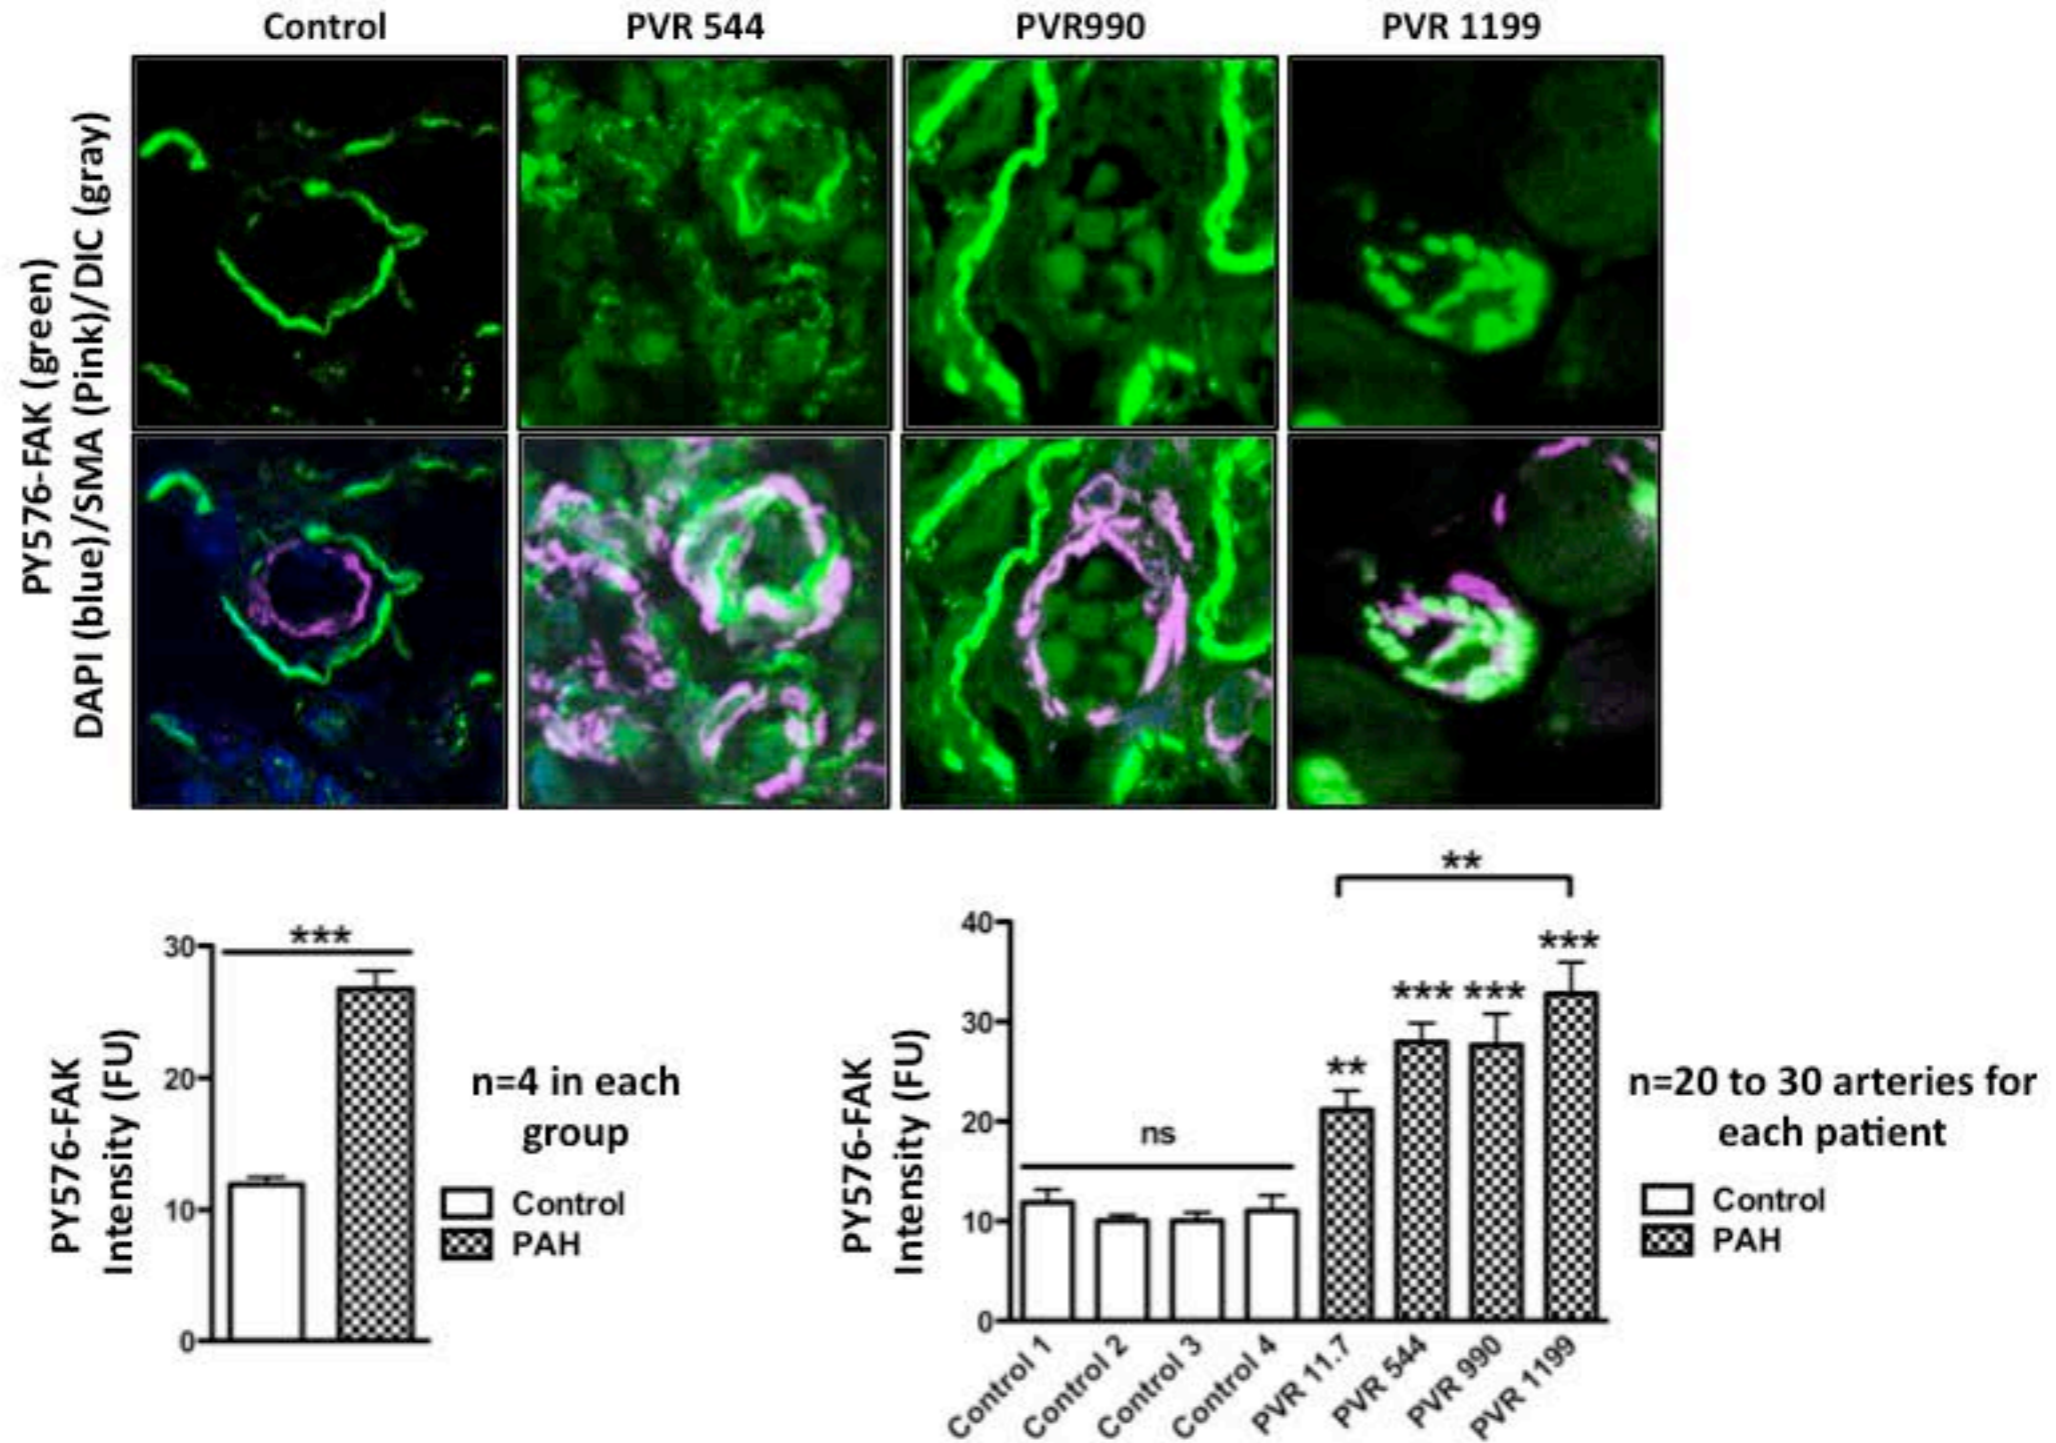

### Supplemental Figure 3

*PY397 and PY576-FAK are increased in resistance PAs of MCT-PAH rats and inhibited by siFAK or PF-228 treatments.*

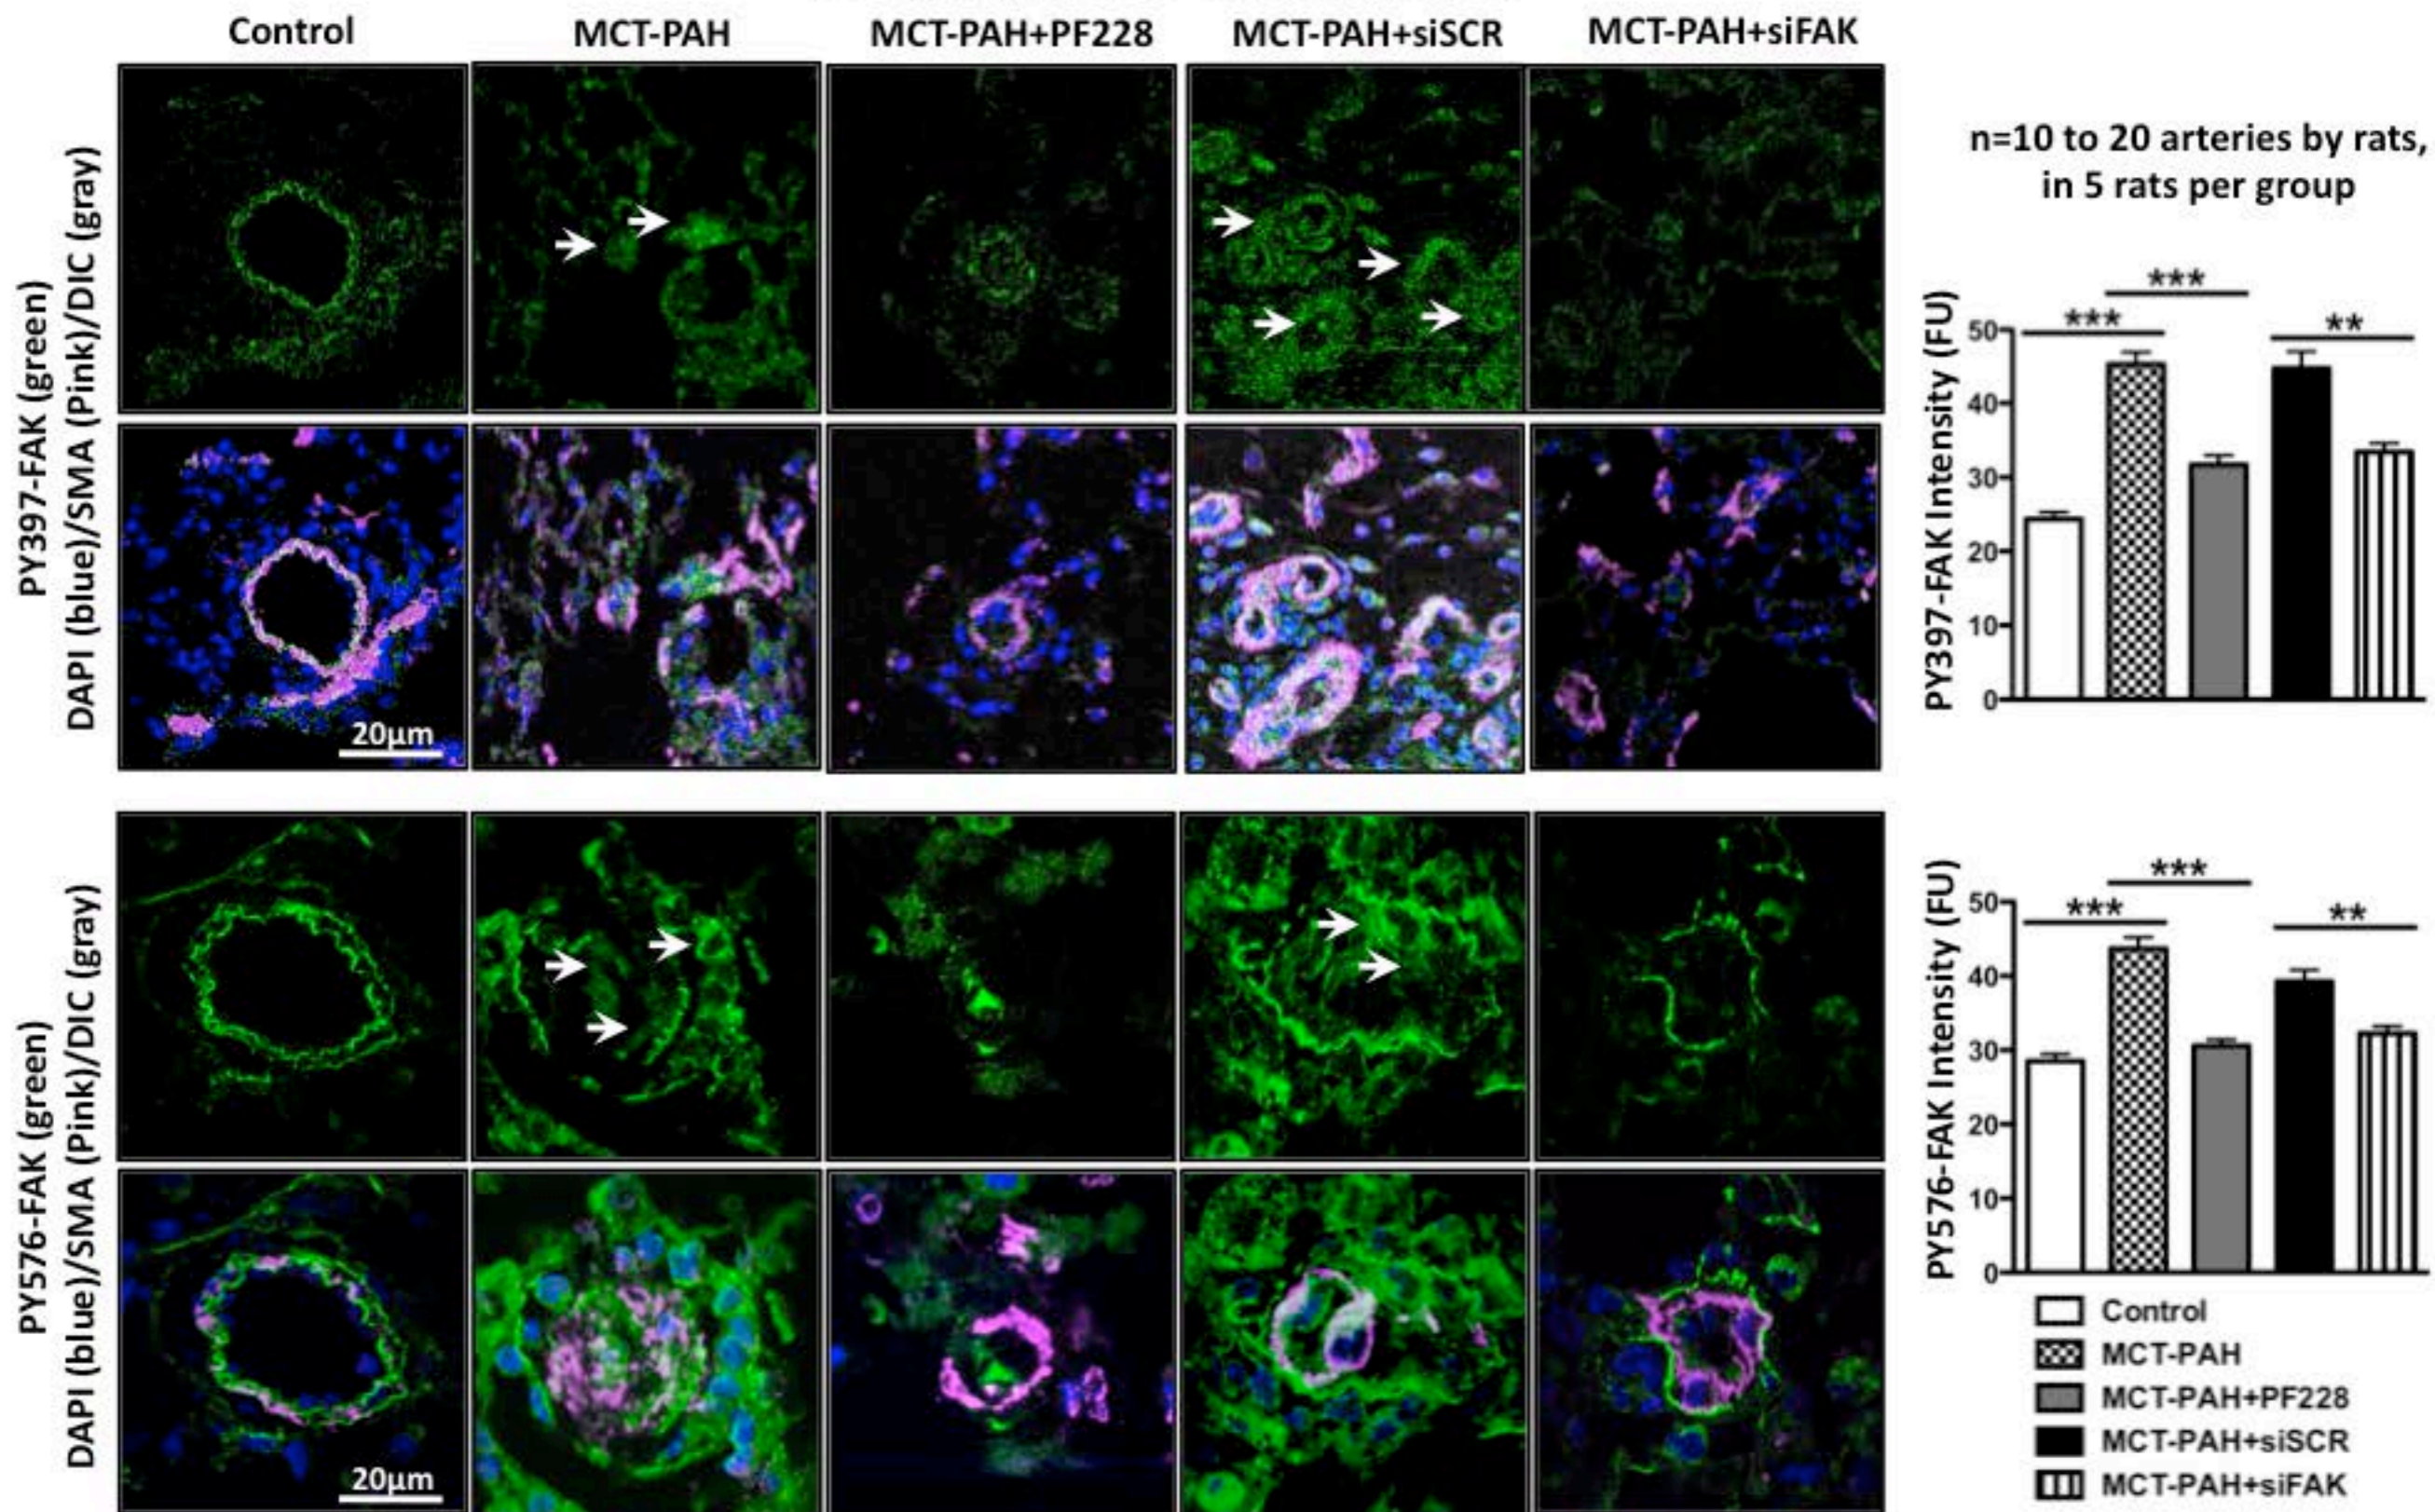

## Supplemental Figure 4

*PY397 and PY576-FAK are increased in PAs of MCT-PAH rats and inhibited by siFAK or PF-228 treatments.*

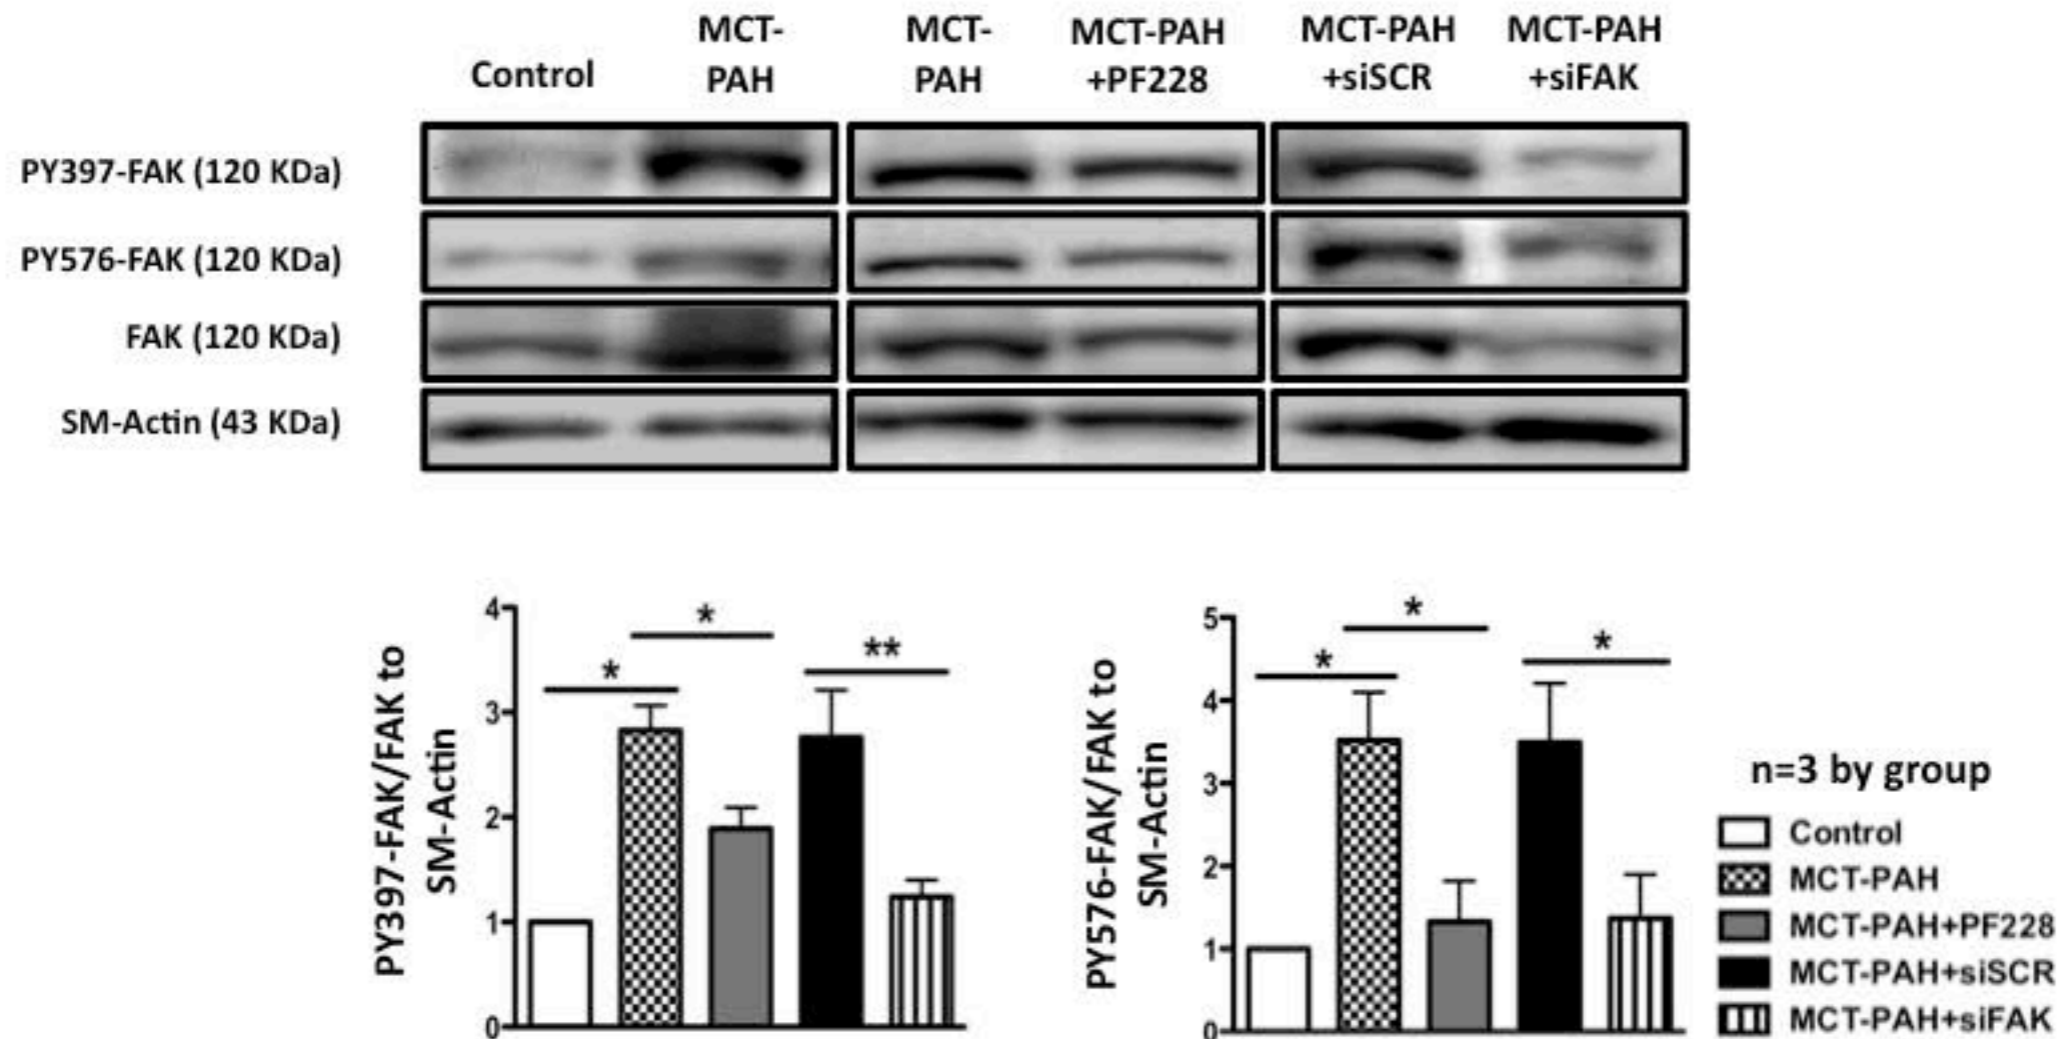

## Supplemental Figure 5

### A FAK inhibition decreases STAT3 activation in vivo in distal PAs- Western Blot on PAs.

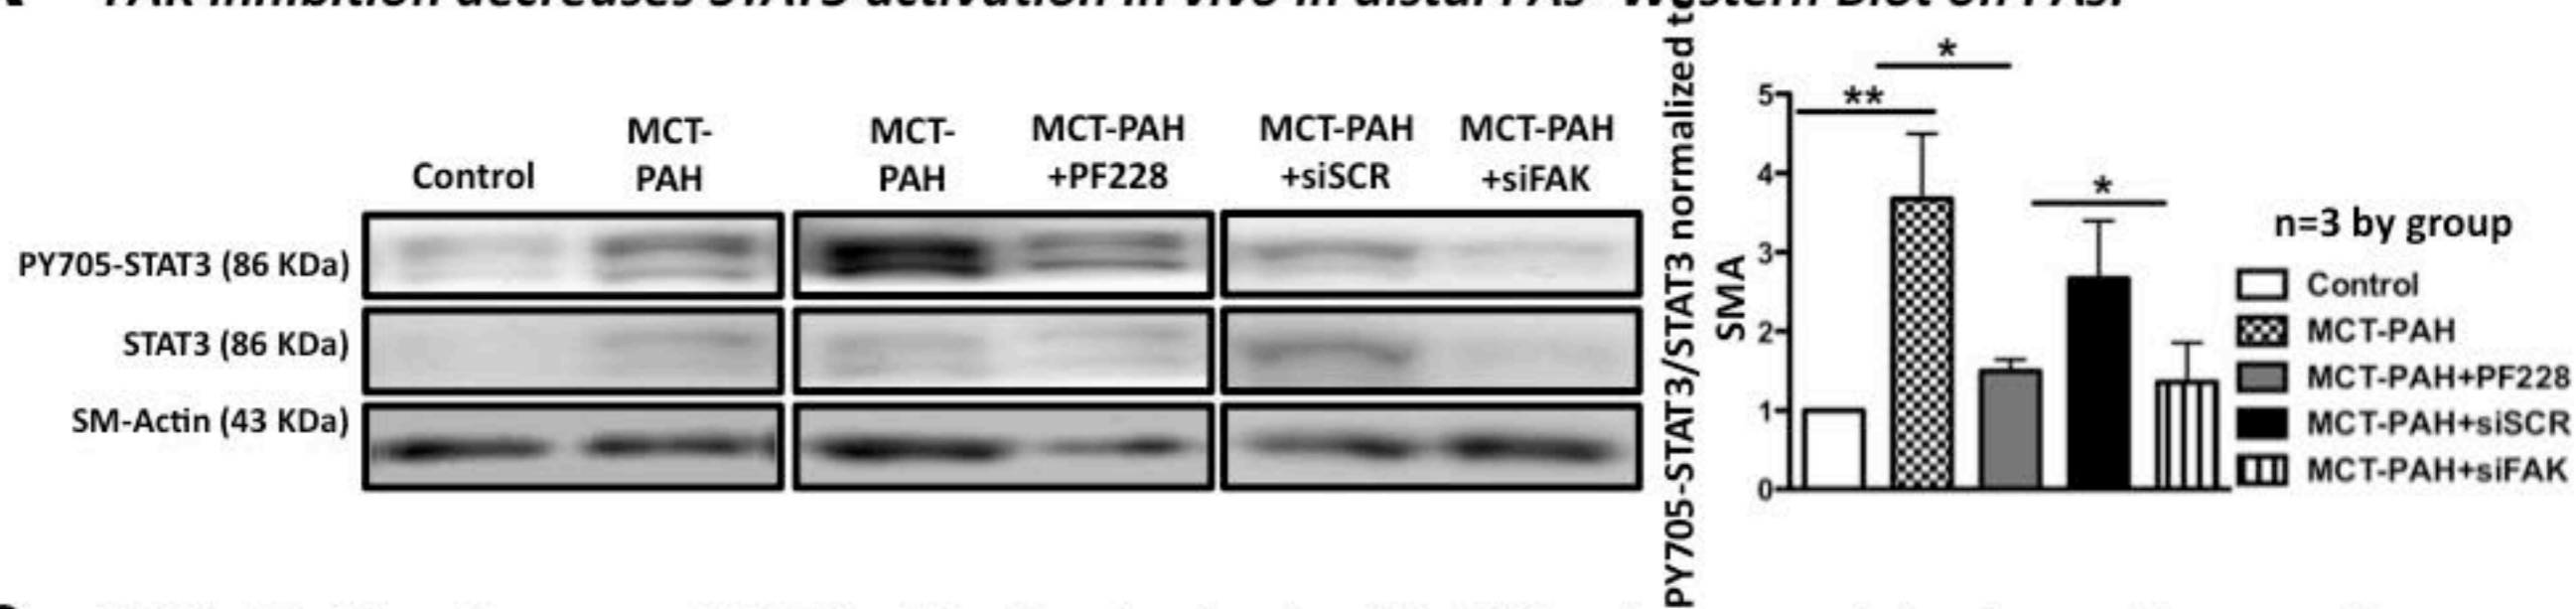

### B FAK inhibition decreases STAT3 activation in vivo in distal PAs - Immunostaining on lung section.

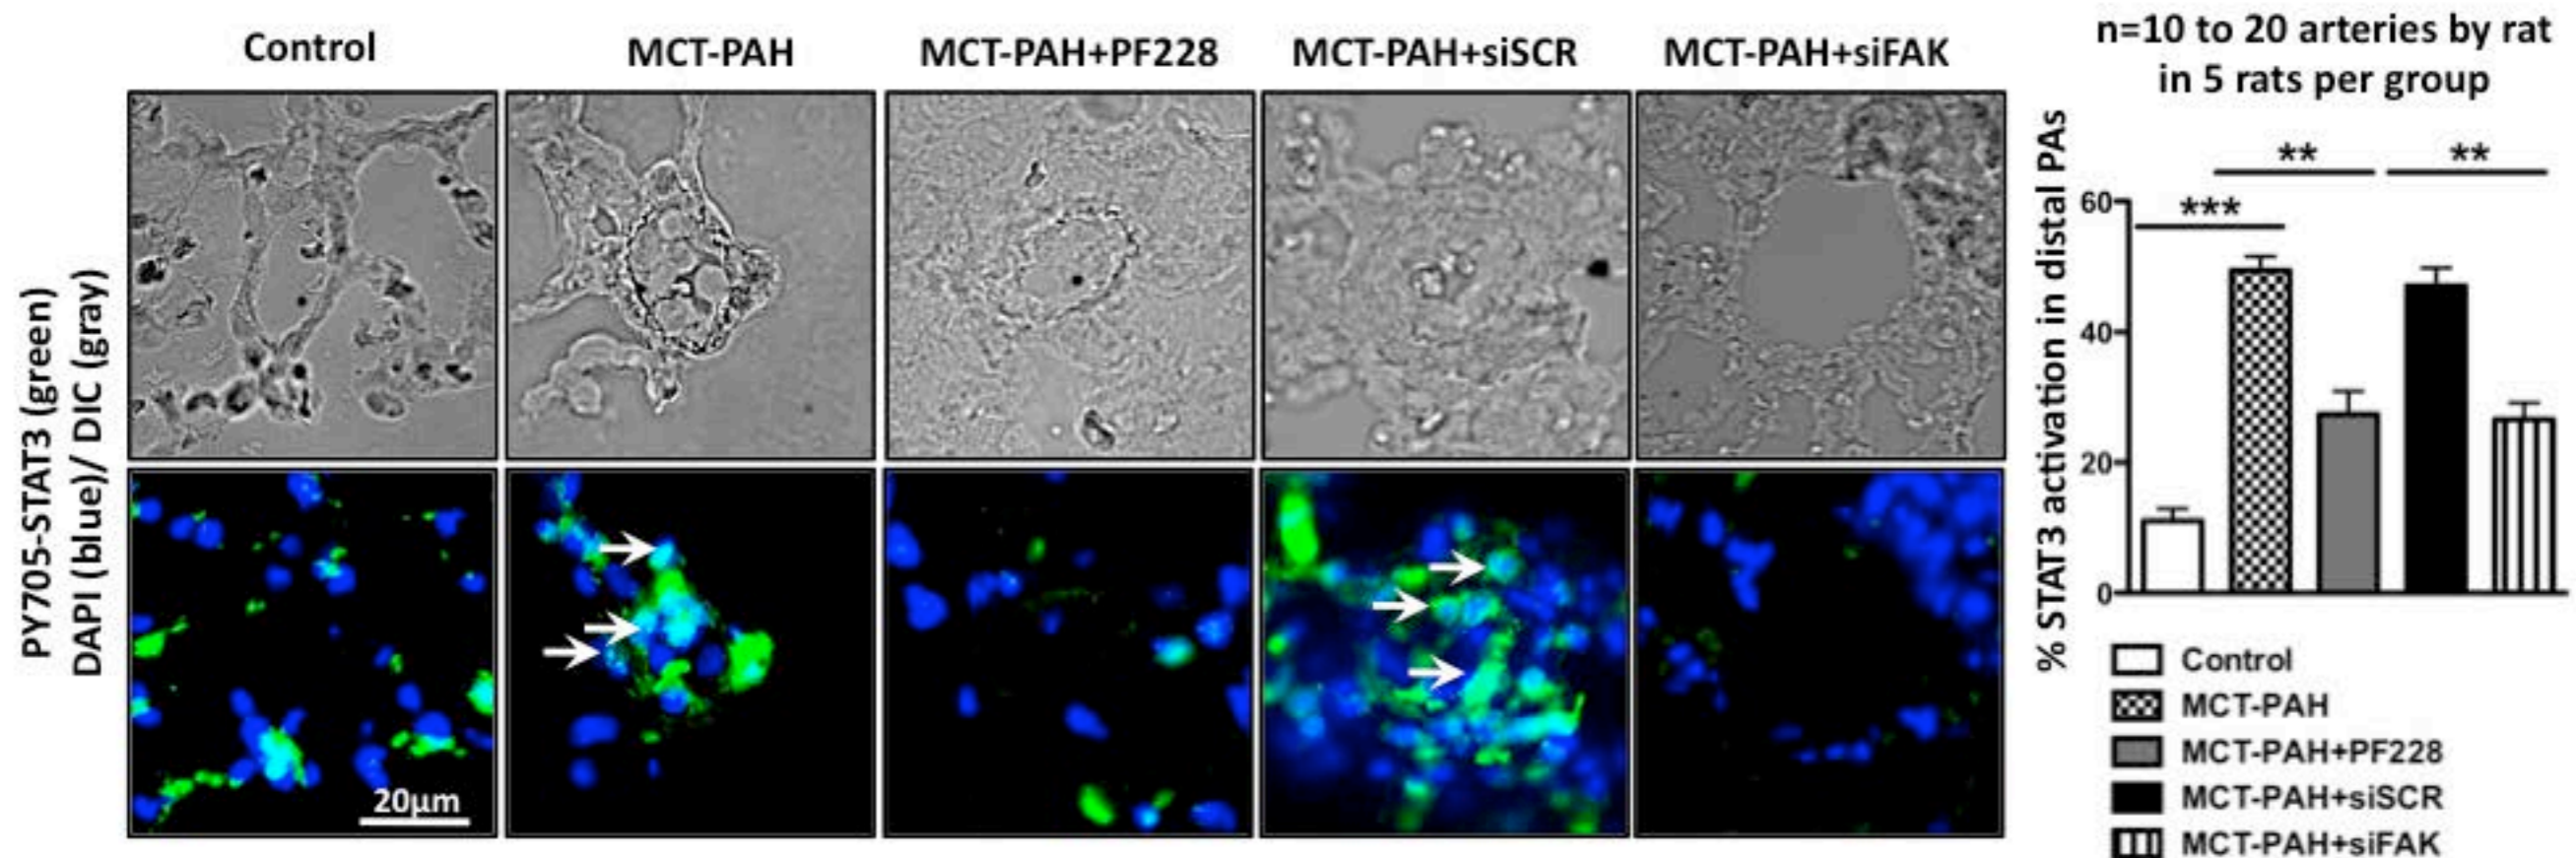

## Supplemental Figure 6

*FAK inhibition increases PAH-PASMCs mitochondrial dependent apoptosis*

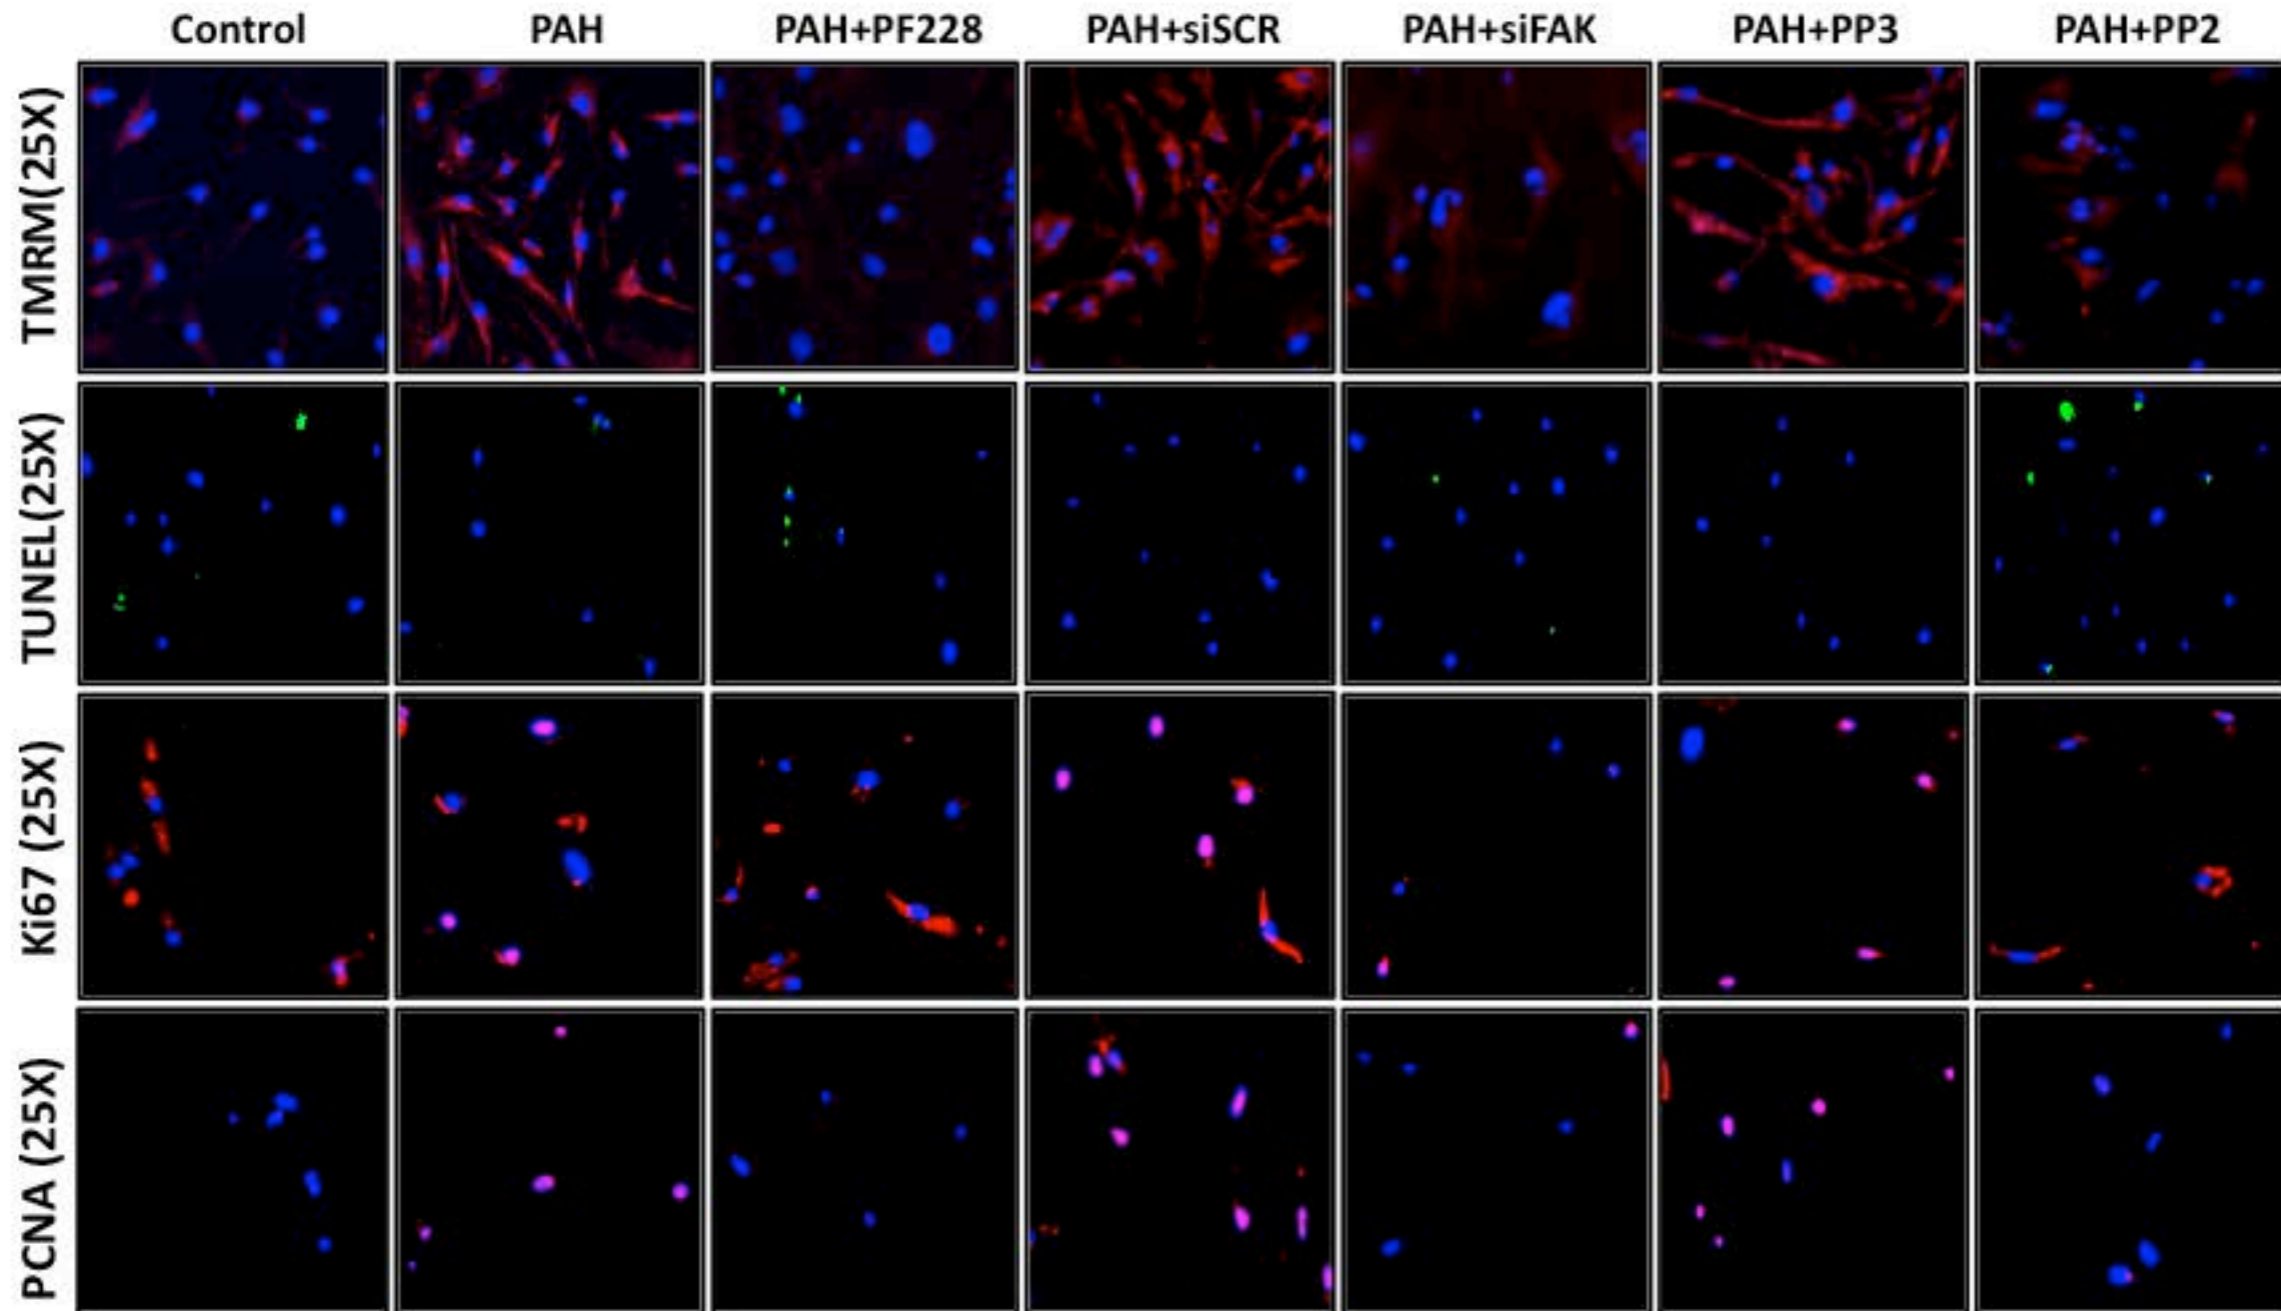

## Supplemental Figure 7

*FAK inhibition treatments decreased PAECs proliferation in vivo.*

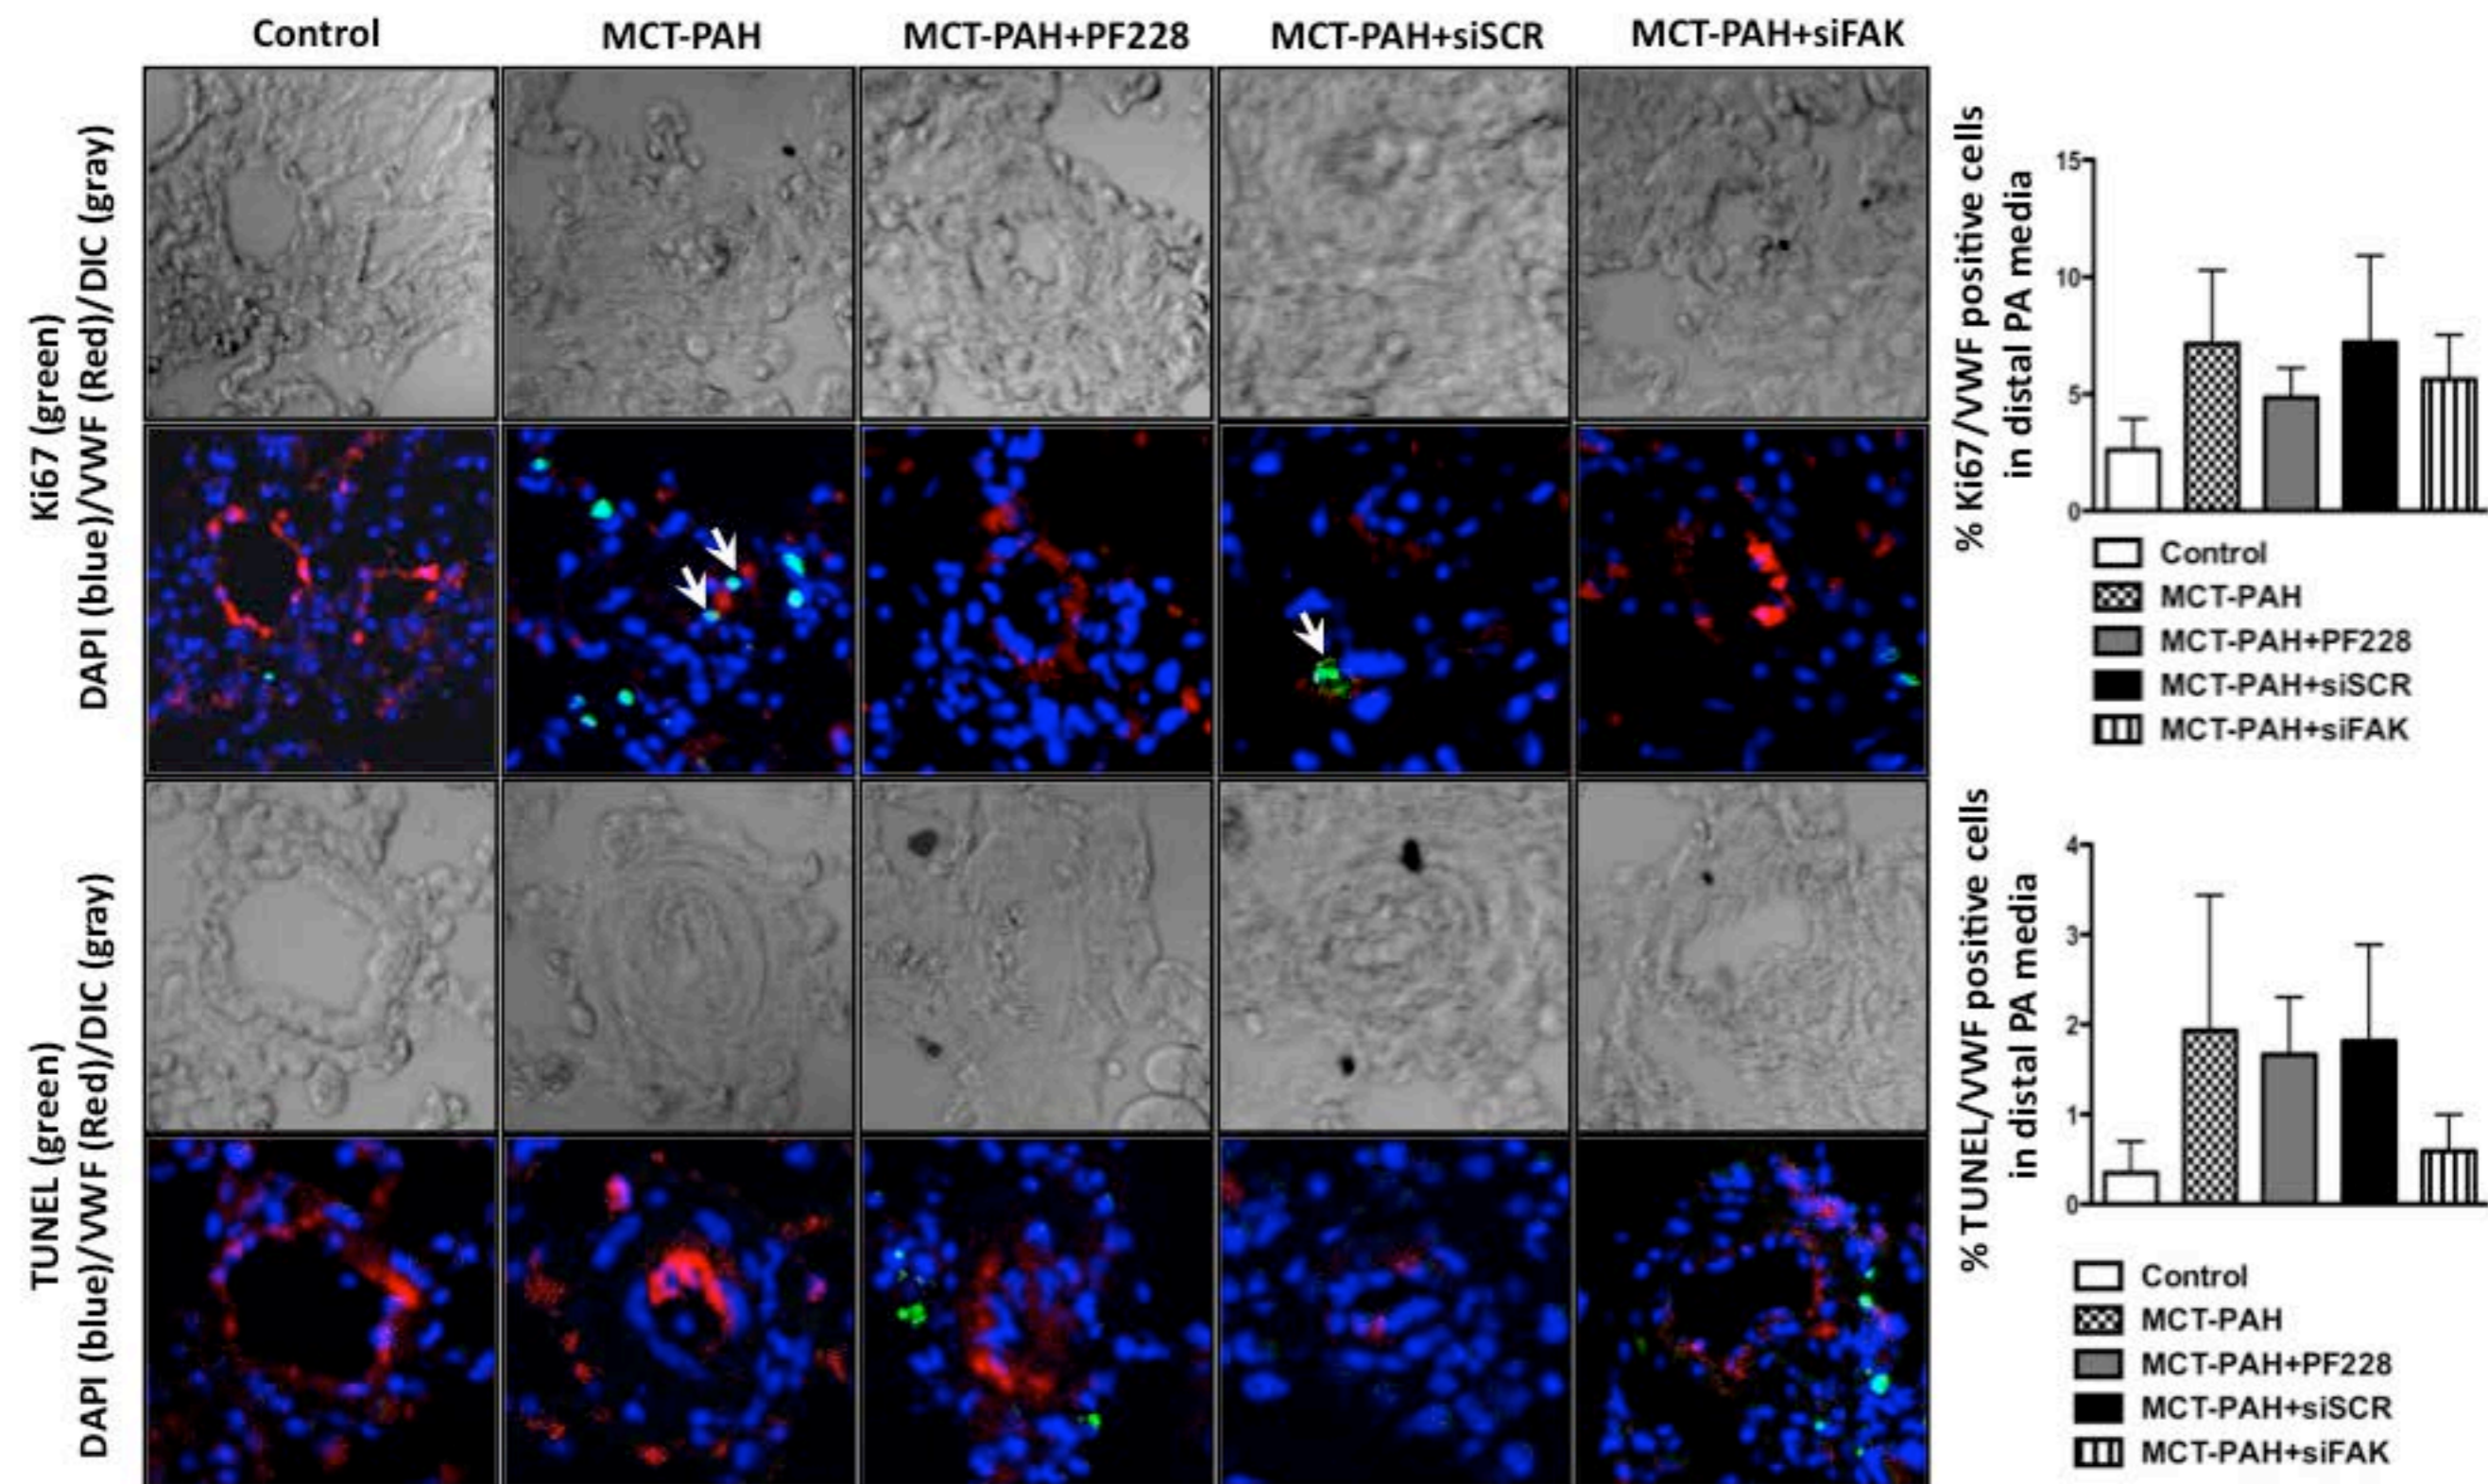

Supplement: FAK_paper_ERJ_Supp_Figures_R1.pdf [file FAK_paper_ERJ_Supp_Figures_R1.pdf]
